# Supplementary material for: Selective encapsulation of a chloride anion in a 1H-pyrazole Cu2+ metallocage
Source: Royal Society of Chemistry journal article supplement (doi:10.1039/d1dt01302e), 2021-01-01
Supplement: d1dt01302e1.pdf [file d1dt01302e1.pdf]

# Selective Encapsulation of a Chloride Anion in a 1*H*-Pyrazole Cu<sup>2+</sup>.

Javier Pitarch-Jarque,<sup>a</sup> Hermas R. Jiménez,<sup>a</sup> Elina Kalenius,<sup>b</sup> Salvador Blasco,<sup>\*a</sup> Alberto Lopera,<sup>a</sup> M. Paz Clares,<sup>a</sup> Kari Rissanen<sup>b</sup> and Enrique García-España<sup>\*a</sup>

<sup>a</sup> Instituto de Ciencia Molecular, Universidad de Valencia, C/Catedrático José Beltrán Martínez 2, 46980 Paterna, Spain. E-mail: salvador.blasco@uv.es, enrique.garcia-es@uv.es

<sup>b</sup> University of Jyväskylä, Department of Chemistry, P.O. Box. 35, FI-40014; University of Jyväskylä, Finland

## Contents

|                                       |           |
|---------------------------------------|-----------|
| <b>1 Ligand characterisation.</b>     | <b>2</b>  |
| <b>2 Crystallographic information</b> | <b>4</b>  |
| <b>3 Mass Spectroscopy</b>            | <b>11</b> |
| <b>4 UV-vis titrations</b>            | <b>12</b> |

## List of Figures

|                                                                                                            |    |
|------------------------------------------------------------------------------------------------------------|----|
| S1: <sup>1</sup> H and <sup>13</sup> C NMR characterisation of L . . . . .                                 | 2  |
| S2: COSY and HSQC NMR spectra of L. . . . .                                                                | 3  |
| S3: Hirshfeld surface analysis for structure 1 . . . . .                                                   | 5  |
| S4: Hirshfeld surface analysis for structure 2 . . . . .                                                   | 6  |
| S5: Hirshfeld surface analysis for structure 3 . . . . .                                                   | 7  |
| S6: Hirshfeld surface analysis for structure 4 . . . . .                                                   | 8  |
| S7: Crystal structure (3) . . . . .                                                                        | 9  |
| S8: Pictures of the crystals sampled. . . . .                                                              | 10 |
| S9: Mass Spectrum ESI(+) of crystals of <b>3</b> dissolved in H <sub>2</sub> O/CH <sub>3</sub> CN. . . . . | 11 |
| S10: Expanded mass spectrometry peaks . . . . .                                                            | 11 |
| S11: UV-vis spectra for the titration with chloride . . . . .                                              | 12 |

## List of Tables

|                                                       |    |
|-------------------------------------------------------|----|
| S1: Crystallographic data . . . . .                   | 4  |
| S2: Hydrogen bonds of structure <b>1</b> . . . . .    | 5  |
| S3: Hydrogen bonds of structure <b>2</b> . . . . .    | 6  |
| S4: Hydrogen bonds of structure <b>3</b> . . . . .    | 7  |
| S5: Hydrogen bonds of structure <b>4</b> . . . . .    | 8  |
| S6: Ions observed in the ESI(+)-MS spectrum . . . . . | 12 |

## 1 Ligand characterisation.

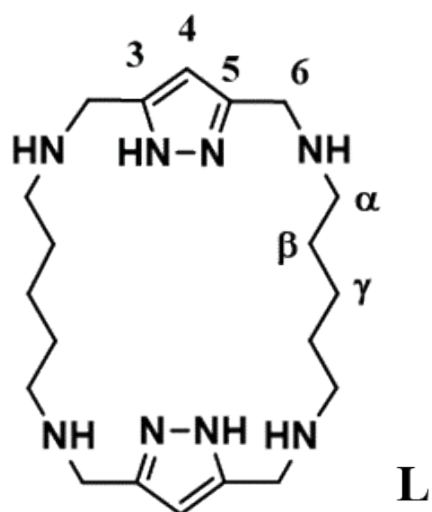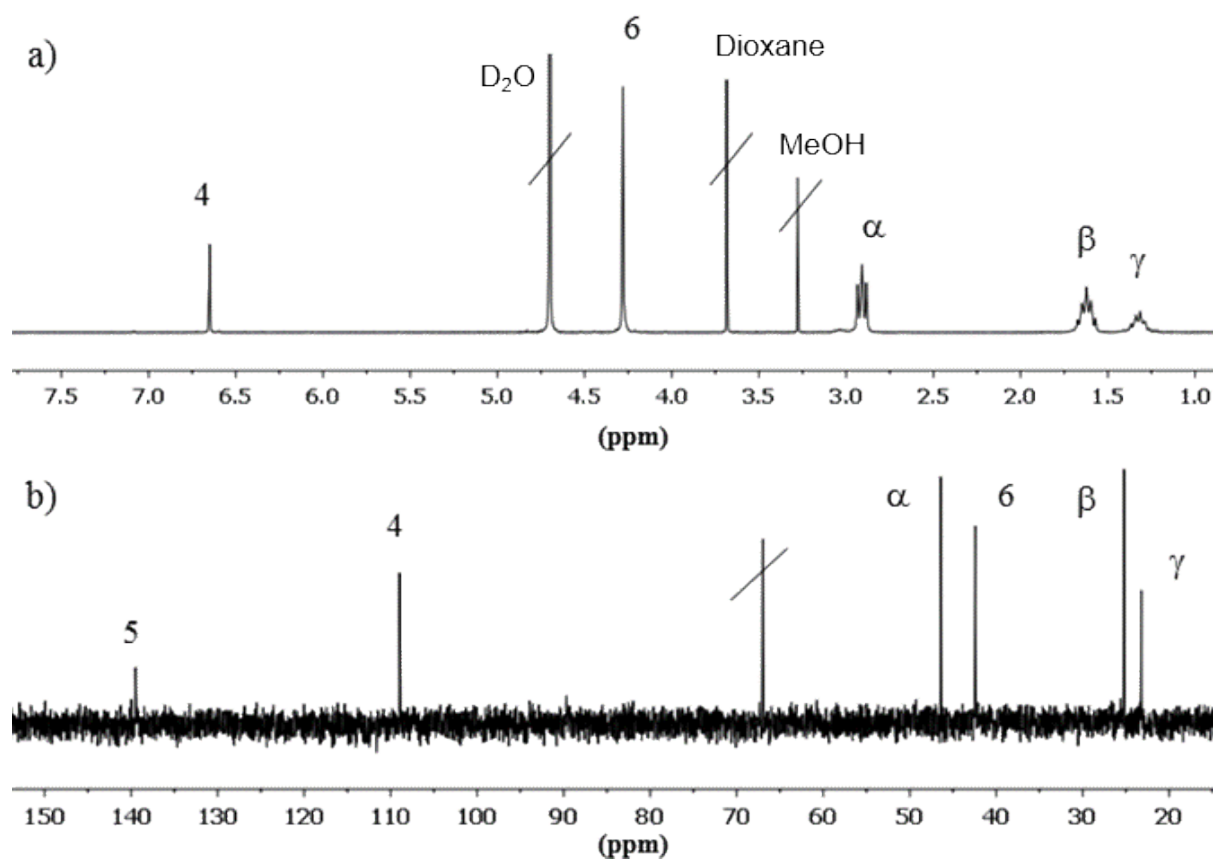

Figure S1: (a)  $^1\text{H}$  NMR (300 MHz,  $\text{D}_2\text{O}$ ) spectrum of **L**. (b)  $^{13}\text{C}$  NMR (75 MHz,  $\text{D}_2\text{O}$ ) spectrum of **L**.

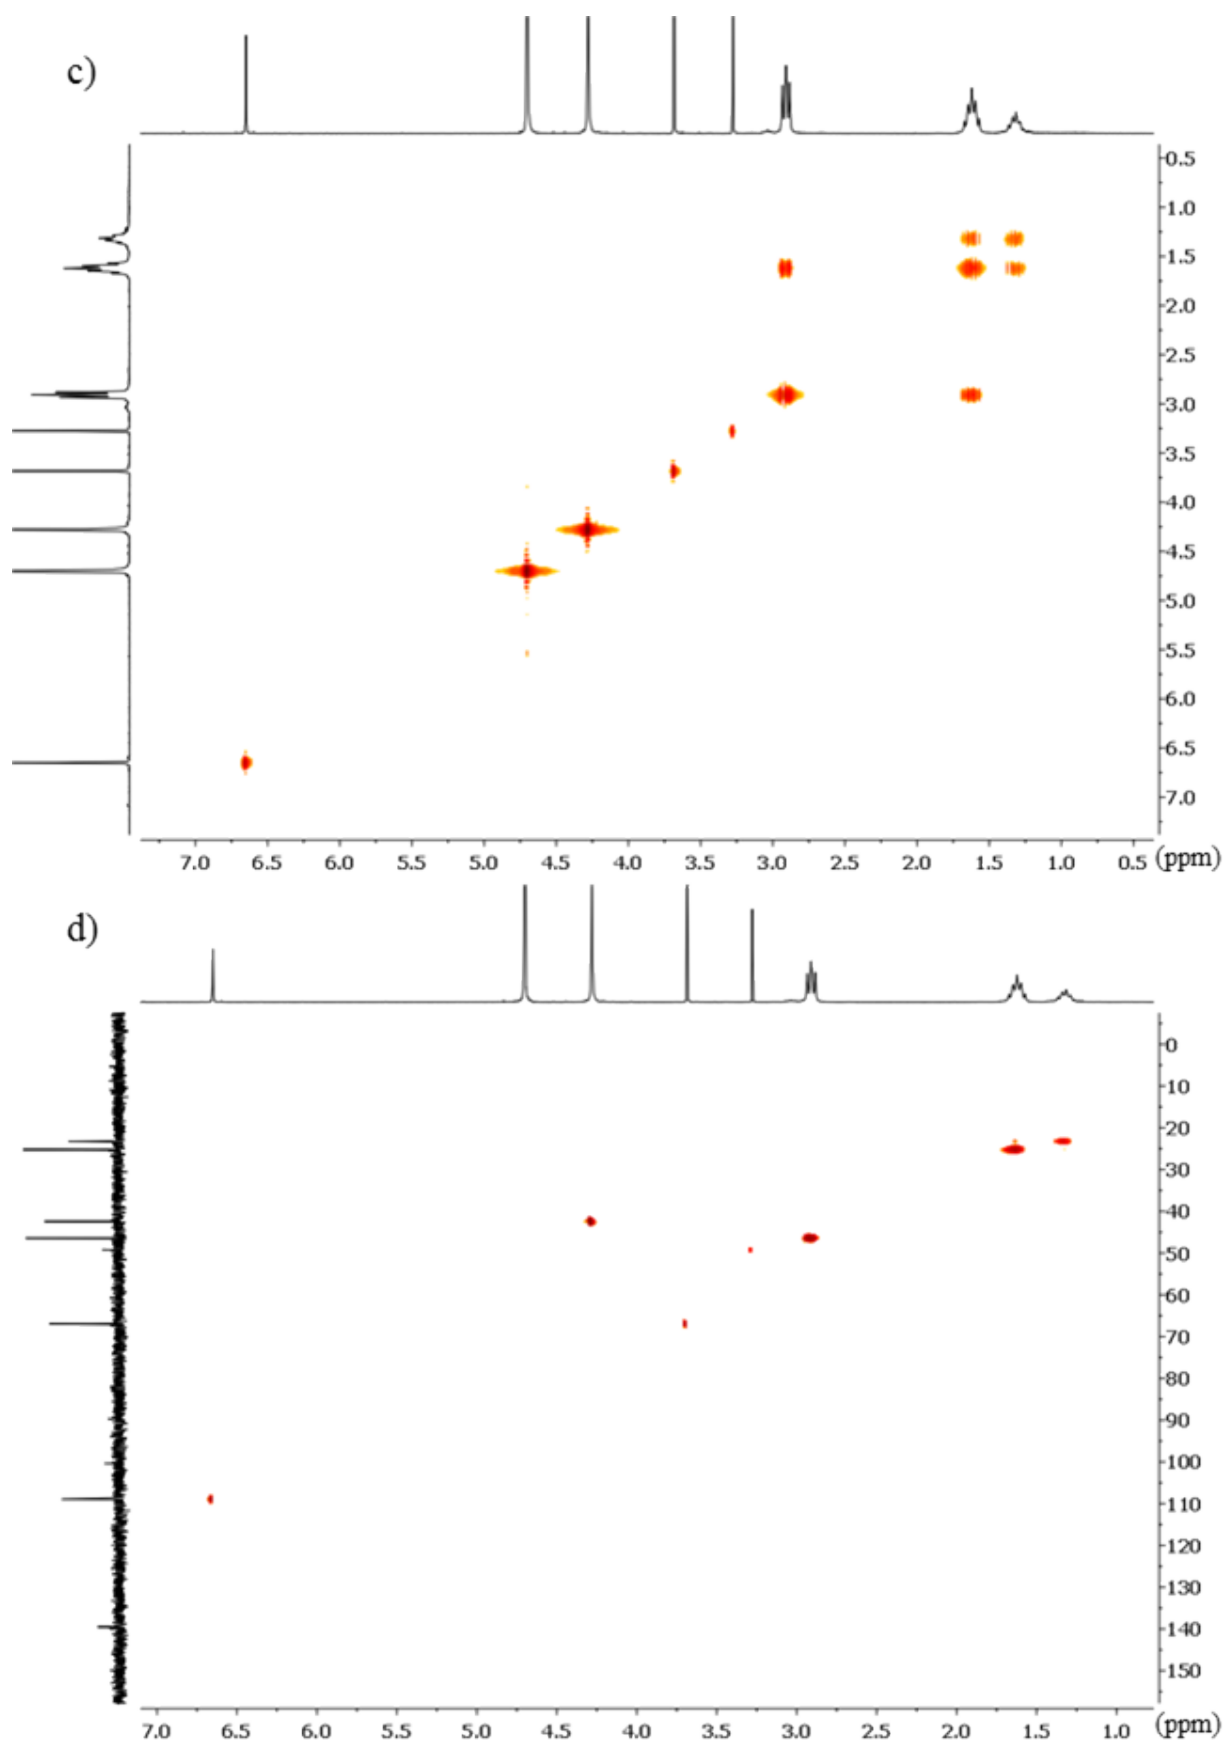

Figure S2: (c) COSY and (d) HSQC in D<sub>2</sub>O of L.

## 2 Crystallographic information

Table S1: Crystallographic data

|                                                          | 1                                                                                                                      | 2                                                                                              | 3                                                                                | 4                                                                                                  |
|----------------------------------------------------------|------------------------------------------------------------------------------------------------------------------------|------------------------------------------------------------------------------------------------|----------------------------------------------------------------------------------|----------------------------------------------------------------------------------------------------|
| Formula                                                  | C <sub>40</sub> H <sub>78.67</sub> Cu <sub>4</sub> F <sub>14</sub> N <sub>16</sub><br>O <sub>5.33</sub> P <sub>2</sub> | C <sub>40</sub> H <sub>74</sub> Cl <sub>4</sub> Cu <sub>4</sub> N <sub>16</sub> O <sub>3</sub> | C <sub>80</sub> H <sub>136</sub> Br <sub>4</sub> Cu <sub>8</sub> N <sub>32</sub> | C <sub>40</sub> H <sub>60</sub> ClCu <sub>5</sub><br>I <sub>7</sub> N <sub>16</sub> O <sub>4</sub> |
| Weight / g mol <sup>-1</sup>                             | 1451.27                                                                                                                | 1223.11                                                                                        | 2374.16                                                                          | 2077.10                                                                                            |
| Density / g cm <sup>-3</sup>                             | 1.423                                                                                                                  | 1.601                                                                                          | 1.488                                                                            | 1.962                                                                                              |
| Size                                                     | 0.30 × 0.10 × 0.05                                                                                                     | 0.20 × 0.20 × 0.20                                                                             | 0.24 × 0.09 × 0.08                                                               | 0.20 × 0.10 × 0.10                                                                                 |
| System                                                   | orthorhombic                                                                                                           | triclinic                                                                                      | monoclinic                                                                       | orthorhombic                                                                                       |
| Space Group                                              | <i>I</i> bam                                                                                                           | <i>P</i> -1                                                                                    | <i>I</i> 2/m                                                                     | <i>I</i> mmm                                                                                       |
| Cell                                                     |                                                                                                                        |                                                                                                |                                                                                  |                                                                                                    |
| <i>a</i> /Å                                              | 13.861(3)                                                                                                              | 12.0598(7)                                                                                     | 14.34035(14)                                                                     | 20.5739(9)                                                                                         |
| <i>b</i> /Å                                              | 20.5434(17)                                                                                                            | 14.3764(8)                                                                                     | 18.7171(2)                                                                       | 14.4716(5)                                                                                         |
| <i>c</i> /Å                                              | 23.7890(18)                                                                                                            | 15.6936(6)                                                                                     | 19.8559(2)                                                                       | 11.8083(4)                                                                                         |
| $\alpha$ /°                                              |                                                                                                                        | 108.589(4)                                                                                     |                                                                                  |                                                                                                    |
| $\beta$ /°                                               |                                                                                                                        | 90.753(4)                                                                                      | 96.1863(10)                                                                      |                                                                                                    |
| $\gamma$ /°                                              |                                                                                                                        | 99.531(5)                                                                                      |                                                                                  |                                                                                                    |
| <i>V</i> /Å <sup>3</sup>                                 | 6774.0(17)                                                                                                             | 2537.0(2)                                                                                      | 5298.49(10)                                                                      | 3515.8(2)                                                                                          |
| <i>Z</i>                                                 | 4                                                                                                                      | 2                                                                                              | 2                                                                                | 2                                                                                                  |
| <i>T</i> /K                                              | 291.0(2)                                                                                                               | 120.0(1)                                                                                       | 123(1)                                                                           | 291.0(2)                                                                                           |
| $\Theta$ range / °                                       | 3.21–32.40                                                                                                             | 3.03–32.33                                                                                     | 1.80–26.62                                                                       | 3.84–23.65                                                                                         |
| <i>F</i> (000)                                           | 2981                                                                                                                   | 1268                                                                                           | 2424                                                                             | 1959                                                                                               |
| $\mu$ /cm <sup>-1</sup>                                  | 1.373                                                                                                                  | 1.920                                                                                          | 3.136                                                                            | 4.677                                                                                              |
| Reflections                                              |                                                                                                                        |                                                                                                |                                                                                  |                                                                                                    |
| - total                                                  | 12959                                                                                                                  | 27668                                                                                          | 20584                                                                            | 9900                                                                                               |
| - unique                                                 | 5683                                                                                                                   | 14775                                                                                          | 5669                                                                             | 2586                                                                                               |
| - <i>I</i> > 2 $\sigma$ <sub><i>I</i></sub>              | 2350                                                                                                                   | 7843                                                                                           | 5318                                                                             | 1536                                                                                               |
| Parameters                                               | 209                                                                                                                    | 663                                                                                            | 320                                                                              | 117                                                                                                |
| Constraints                                              | 0                                                                                                                      | 0                                                                                              | 0                                                                                | 0                                                                                                  |
| Restraints                                               | 0                                                                                                                      | 9                                                                                              | 61                                                                               | 0                                                                                                  |
| Indices                                                  | -20 < <i>h</i> < 8<br>-17 < <i>k</i> < 31<br>-34 < <i>l</i> < 15                                                       | -15 < <i>h</i> < 16<br>-20 < <i>k</i> < 20<br>-22 < <i>l</i> < 22                              | -18 < <i>h</i> < 14<br>-23 < <i>k</i> < 20<br>-24 < <i>l</i> < 24                | -26 < <i>h</i> < 27<br>-20 < <i>k</i> < 17<br>-16 < <i>l</i> < 16                                  |
| <i>R</i> (int)                                           | 0.0945                                                                                                                 | 0.0472                                                                                         | 0.0186                                                                           | 0.0332                                                                                             |
| <i>R</i> (sigma)                                         | 0.1500                                                                                                                 | 0.0901                                                                                         | 0.0139                                                                           | 0.0347                                                                                             |
| <i>R</i> 1                                               | 0.2068                                                                                                                 | 0.1311                                                                                         | 0.0519                                                                           | 0.0904                                                                                             |
| <i>R</i> 1( <i>I</i> > 2 $\sigma$ <sub><i>I</i></sub> )  | 0.0835                                                                                                                 | 0.0607                                                                                         | 0.0493                                                                           | 0.0553                                                                                             |
| <i>wR</i> 2                                              | 0.2520                                                                                                                 | 0.1755                                                                                         | 0.1403                                                                           | 0.1925                                                                                             |
| <i>wR</i> 2( <i>I</i> > 2 $\sigma$ <sub><i>I</i></sub> ) | 0.2034                                                                                                                 | 0.1326                                                                                         | 0.1429                                                                           | 0.1623                                                                                             |
| Goof                                                     | 0.921                                                                                                                  | 1.018                                                                                          | 1.039                                                                            | 1.033                                                                                              |
| CCDC number                                              | 1994846                                                                                                                | 1994845                                                                                        | 1994844                                                                          | 1994847                                                                                            |

Table S2: Hydrogen bonds of structure 1

| D-H...A                        | distances / Å |       |          | angles / ° |
|--------------------------------|---------------|-------|----------|------------|
|                                | D-H           | H...A | D...A    | D-H...A    |
| O(1)-H(1A)...(F6)              | 0.92          | 2.21  | 2.748(6) | 117        |
| O(1)-H(1A)...(F4) <sup>i</sup> | 0.92          | 2.21  | 3.067(6) | 156        |
| O(1)-H(1B)...(F2)              | 0.91          | 2.23  | 2.99(3)  | 141        |
| O(1)-H(1B)...(F3)              | 0.91          | 2.29  | 2.84(2)  | 119        |
| N(2)-H(2)...(F5)               | 0.98          | 2.10  | 2.905(5) | 138        |
| N(2)-H(2)...(F6)               | 0.98          | 2.19  | 3.087(6) | 152        |
| N(3)-H(3)...(F5)               | 0.98          | 2.32  | 3.062(5) | 132        |
| N(3)-H(3)...(F4) <sup>i</sup>  | 0.98          | 2.09  | 3.034(6) | 162        |

D: donor, A: acceptor, H: hydrogen. Symmetry operations: (i)  $\frac{1}{2} - x, \frac{1}{2} - y, \frac{1}{2} - z$

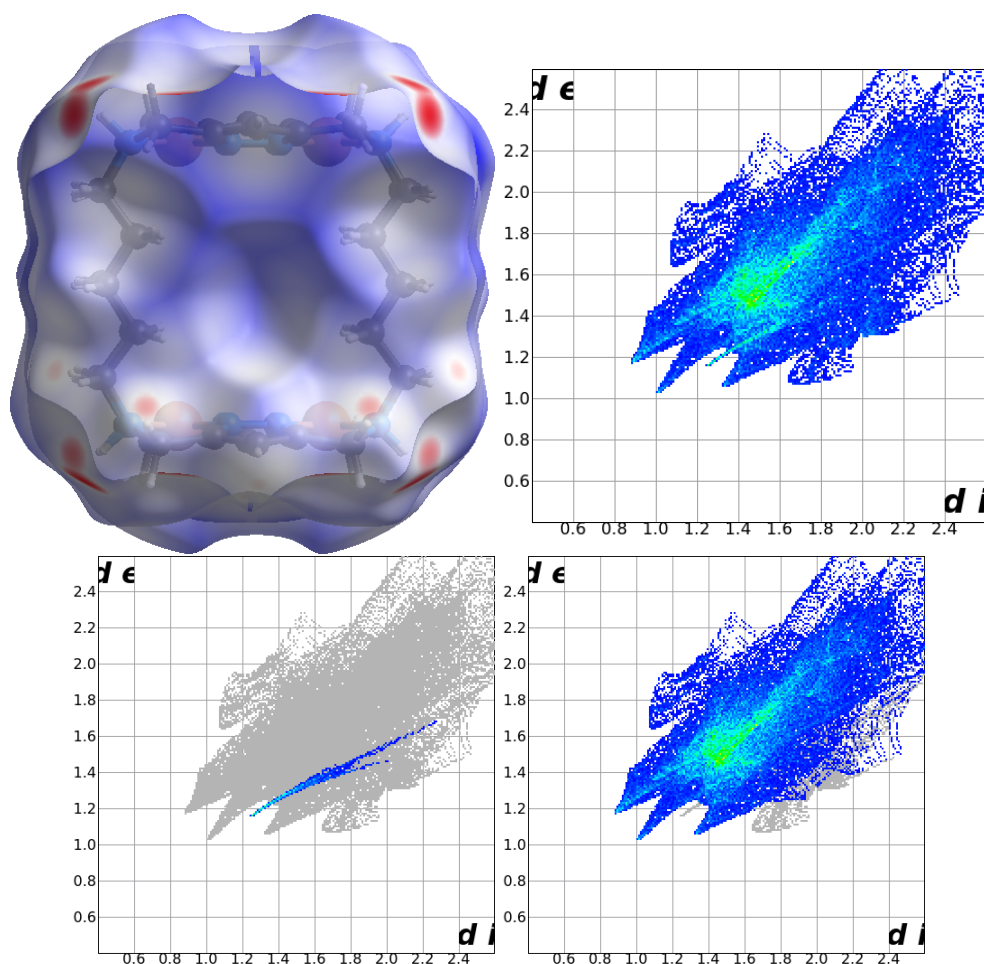

Figure S3: (top) Hirshfeld surface representation for structure 1. (middle) Hirshfeld surface fingerprint for all interactions. (bottom left) Interactions involving copper from the inside and oxygen on the outside which represent 2.1% of the Hirshfeld surface. (bottom right) Interactions involving hydrogen from the inside with any atom in the outside which account for 92.1% of the Hirshfeld surface.

**Table S3:** Hydrogen bonds of structure 2

| D-H...A                            | distances / Å |       |          | angles / ° |
|------------------------------------|---------------|-------|----------|------------|
|                                    | D-H           | H...A | D...A    | D-H...A    |
| N(16)-H(16)...O(3)                 | 1.00          | 2.13  | 3.127(4) | 175.5      |
| N(4)-H(4)...Cl(2) <sup>i</sup>     | 1.00          | 2.46  | 3.293(4) | 140.2      |
| N(5)-H(5)...O(1) <sup>ii</sup>     | 1.00          | 2.17  | 3.021(5) | 141.4      |
| N(1)-H(1)...Cl(4) <sup>iii</sup>   | 1.00          | 2.31  | 3.230(4) | 152.4      |
| O(3)-H(3A)...Cl(3) <sup>iii</sup>  | 0.78          | 2.38  | 3.076(3) | 149.2      |
| O(3)-H(3B)...Cl(4) <sup>iv</sup>   | 0.82          | 2.49  | 3.173(3) | 141.2      |
| C(6)-H(6B)...Cl(1)                 | 0.99          | 2.66  | 3.28(1)  | 121.5      |
| N(13)-H(13A)...Cl(3) <sup>ii</sup> | 1.00          | 2.40  | 3.303(4) | 150.2      |
| N(13)-H(13A)...O(1) <sup>ii</sup>  | 1.00          | 2.50  | 3.238(5) | 130.8      |
| O(2)-H(2A)...Cl(2) <sup>iv</sup>   | 0.80          | 2.43  | 3.154(5) | 150.6      |
| O(2)-H(2B)...Cl(4) <sup>v</sup>    | 0.81          | 2.43  | 3.161(5) | 150.0      |

D: donor, A: acceptor, H: hydrogen. Symmetry operations: (i)  $-x, 1-y, 1-z$ ; (ii)  $1-x, 1-y, 1-z$ ; (iii)  $x, 1+y, z$ ; (iv)  $1-x, 1-y, 1-z$ ; (v)  $1-x, -y, 1-z$ .

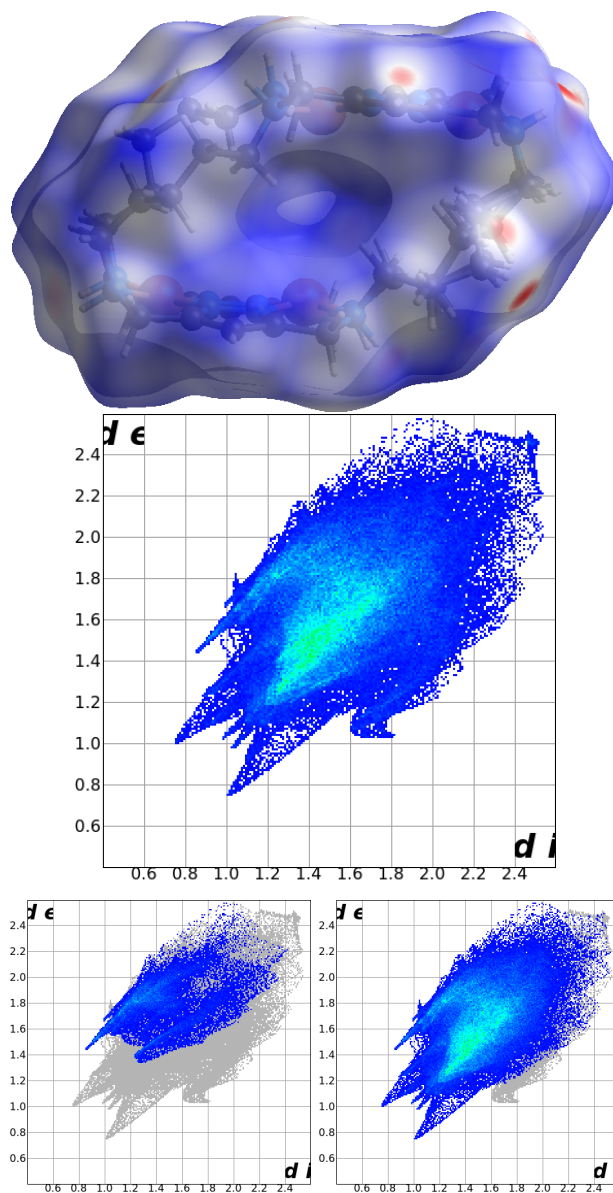

**Figure S4:** (top) Hirshfeld surface representation for structure 2. (middle) Hirshfeld surface fingerprint for all interactions. (bottom left) Interactions involving chlorine outside with any atom in the inside which represent 15.7% of the Hirshfeld surface. (bottom right) Interactions involving hydrogen from the inside with any atom in the outside which account for 89.7% of the Hirshfeld surface.

Table S4: Hydrogen bonds of structure 3

| D-H...A                          | distances / Å |       |          | angles / ° |
|----------------------------------|---------------|-------|----------|------------|
|                                  | D-H           | H...A | D...A    | D-H...A    |
| N(5)-H(5A)... Br(1) <sup>i</sup> | 1.00          | 2.60  | 3.336(5) | 130.6      |
| N(1)-H(1)... Br(2) <sup>ii</sup> | 1.00          | 2.58  | 3.433(3) | 143.6      |

D: donor, A: acceptor, H: hydrogen. Symmetry operations: (i)  $\frac{3}{2} - x, \frac{1}{2} + y, \frac{1}{2} - z$ ; (ii)  $-x, -y, 1 - z$ .

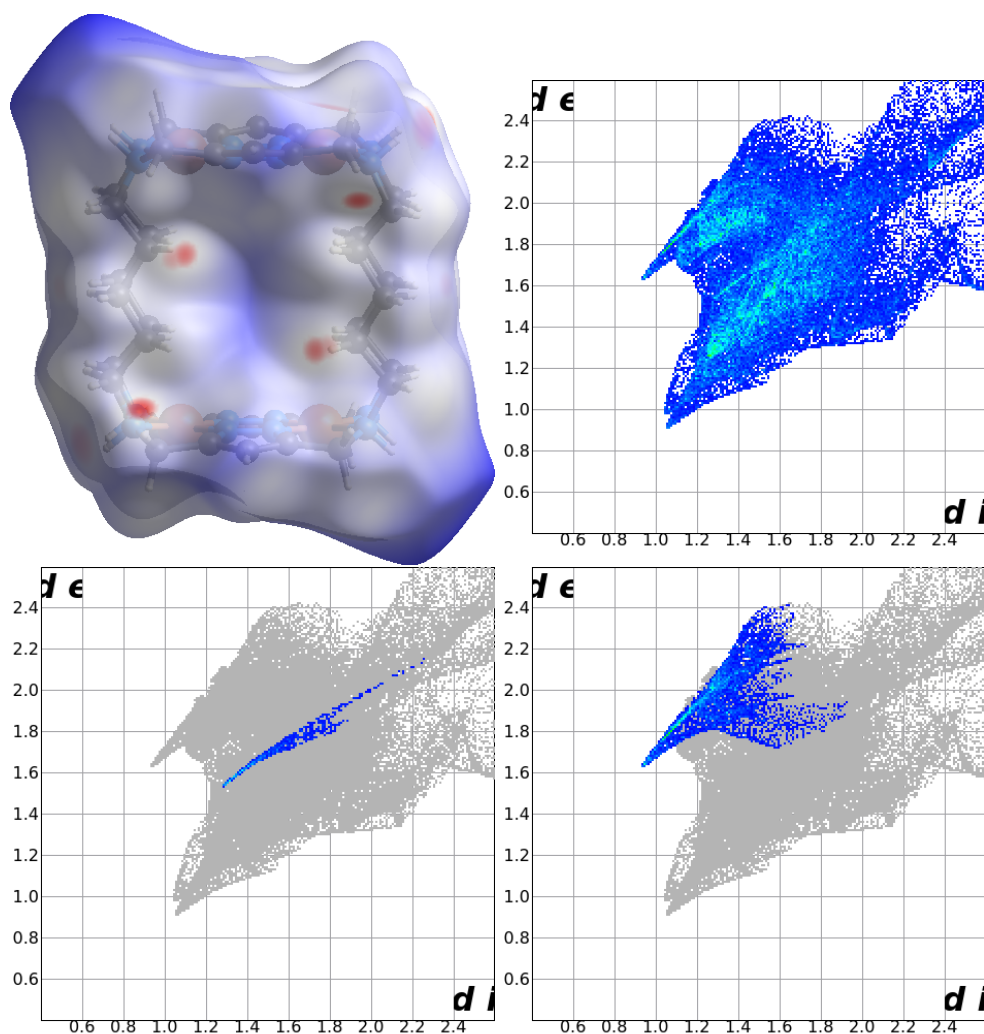

Figure S5: (top) Hirshfeld surface representation for structure 3. (middle) Hirshfeld surface fingerprint for all interactions. (bottom left) Interactions involving oxygen outside with copper inside which represent 0.12% of the Hirshfeld surface. (bottom right) Interactions involving hydrogen from the inside with any atom in the outside which account for 8.3% of the Hirshfeld surface.

Table S5: Hydrogen bonds of structure 4

| D-H...A           | distances / Å |       |          | angles / ° |
|-------------------|---------------|-------|----------|------------|
|                   | D-H           | H...A | D...A    | D-H...A    |
| C(3)-H(3B)...(I2) | 0.97          | 2.95  | 3.920(7) | 178        |

D: donor, A: acceptor, H: hydrogen.

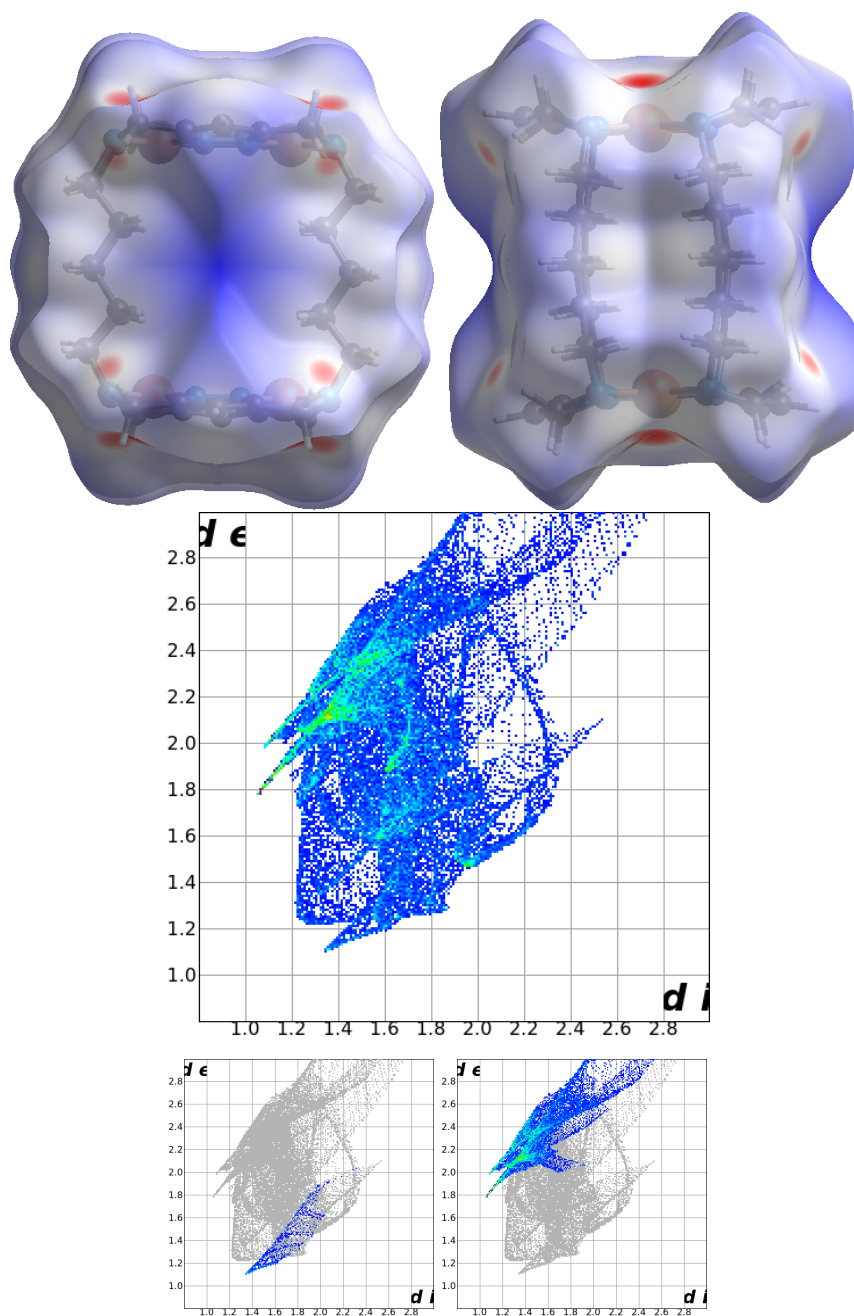

Figure S6: (top) Hirshfeld surface representation for structure 4. (middle) Hirshfeld surface fingerprint for all interactions. (bottom left) Interactions involving oxygen outside with copper inside which represent 2.4% of the Hirshfeld surface. (bottom right) Interactions involving hydrogen from the inside with iodine atoms in the outside which account for 38.0% of the Hirshfeld surface.



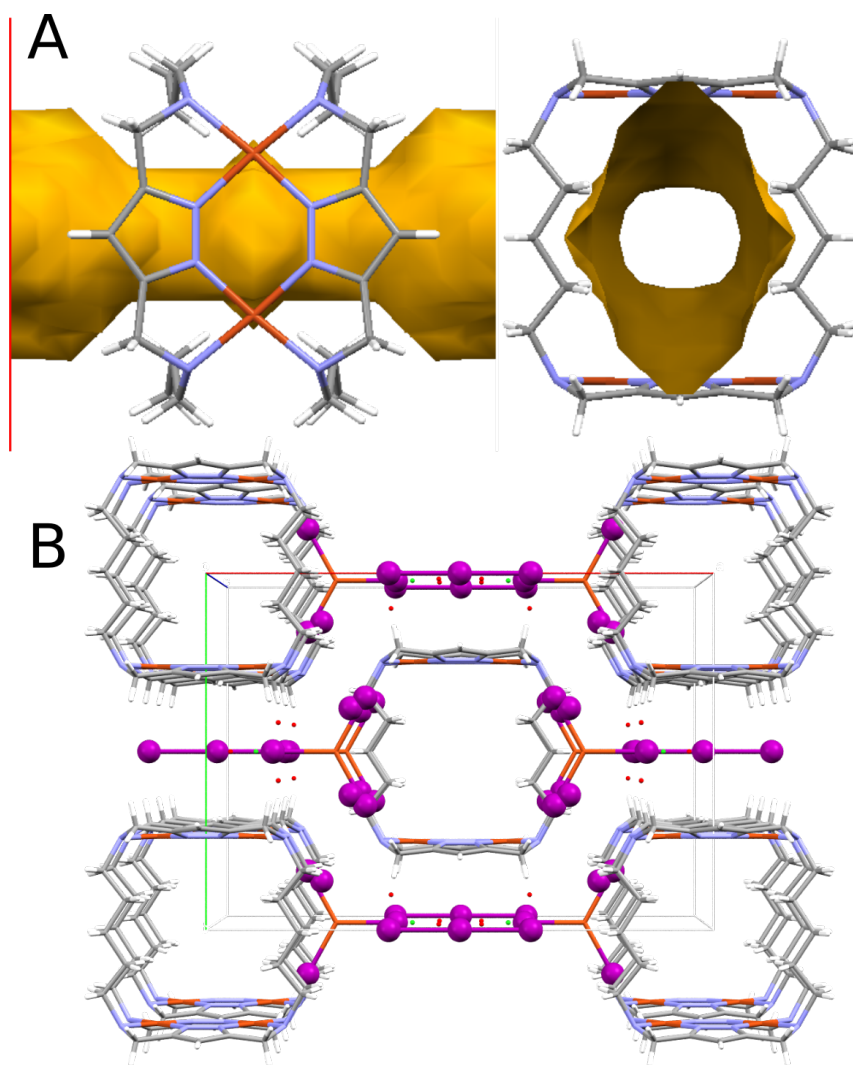

**Figure S7:** (A) Void channels as calculated by Mercury viewed down *b* and *c* axis. (B) Unit cell of **4** showing the arrangements of the anions in the lattice with respect to the  $[\text{Cu}_4(\text{H}_2\text{L})_2]^{4+}$  cations.

no halogen  
(perchlorate counterion)

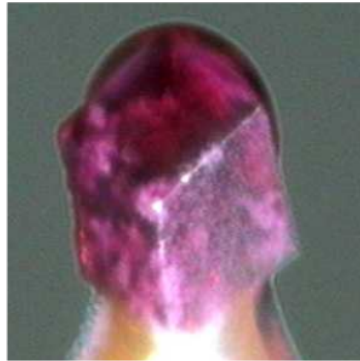

fluoride

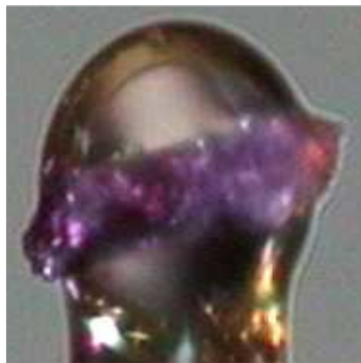

chloride

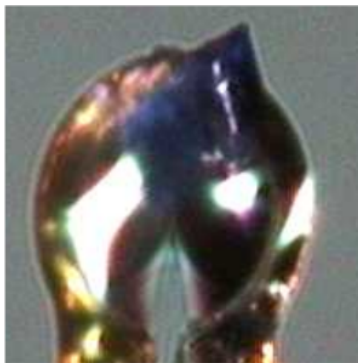

bromide

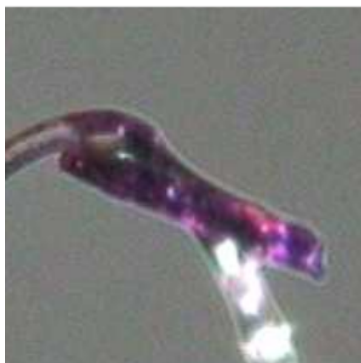

iodide

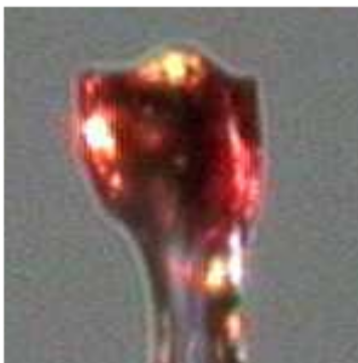

**Figure S8:** Pictures of the crystals sampled.

### 3 Mass Spectroscopy

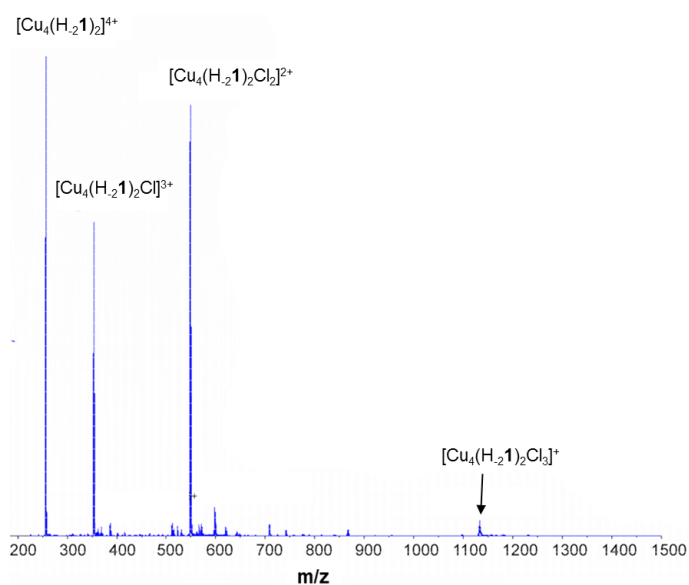

Figure S9: Mass Spectrum ESI(+) of crystals of **3** dissolved in H<sub>2</sub>O/CH<sub>3</sub>CN.

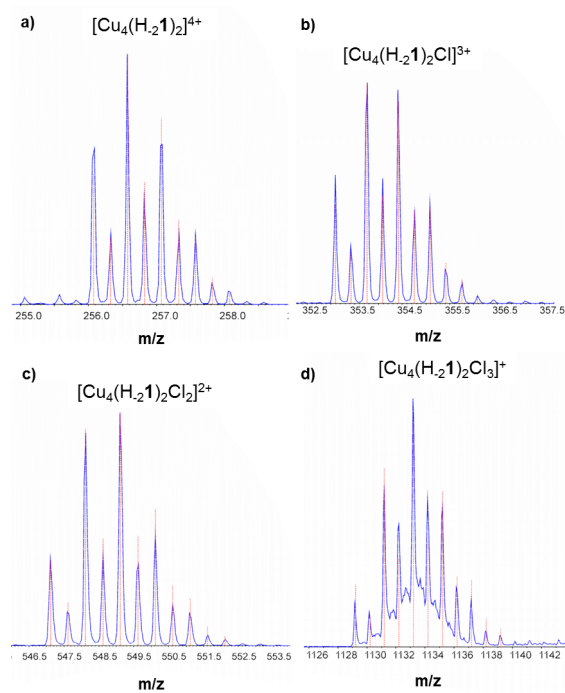

Figure S10: Detail of experimental (blue lines) and calculated (red lines) peaks for  $m/z = 256.0744$  (a),  $353.0892$  (b),  $547.1182$  (c) and  $1129.2057$ .

**Table S6:** The ions observed in the ESI(+)-MS spectrum measured from  $[\text{Cu}_4(\text{H}_2\text{L})]$  with chloride ions, their formulas, theoretical and experimental  $m/z$  values (monoisotopic) and absolute mass accuracies.

| ion                                                   | charge | formula                                                         | $m/z$ (calc) | $m/z$ (exp) | $\Delta(m/z)$ |
|-------------------------------------------------------|--------|-----------------------------------------------------------------|--------------|-------------|---------------|
| $[\text{Cu}_4(\text{H}_2\text{L})_2]^{4+}$            | +4     | $\text{C}_{40}\text{H}_{68}\text{N}_{16}\text{Cu}_4$            | 256.0744     | 256.0783    | 0.0039        |
| $[\text{Cu}_4(\text{H}_2\text{L})_2\text{Cl}]^{3+}$   | +3     | $\text{C}_{40}\text{H}_{68}\text{N}_{16}\text{Cu}_4\text{Cl}$   | 353.0892     | 353.0921    | 0.0029        |
| $[\text{Cu}_5(\text{H}_2\text{L})_2\text{Cl}_2]^{3+}$ | +3     | $\text{C}_{40}\text{H}_{68}\text{N}_{16}\text{Cu}_5\text{Cl}_2$ | 385.7218     | 385.7254    | 0.0036        |
| $[\text{Cu}_4(\text{H}_2\text{L})_2\text{Cl}_2]^{2+}$ | +2     | $\text{C}_{40}\text{H}_{68}\text{N}_{16}\text{Cu}_4\text{Cl}_2$ | 547.1182     | 547.122     | 0.0038        |
| $[\text{Cu}_5(\text{H}_2\text{L})_2\text{Cl}_3]^{2+}$ | +2     | $\text{C}_{40}\text{H}_{68}\text{N}_{16}\text{Cu}_5\text{Cl}_3$ | 596.0674     | 596.0797    | 0.0123        |
| $[\text{Cu}_4(\text{H}_2\text{L})_2\text{Cl}_3]^+$    | +1     | $\text{C}_{40}\text{H}_{68}\text{N}_{16}\text{Cu}_4\text{Cl}_3$ | 1129.2057    | 1129.183    | 0.0227        |

## 4 UV-vis titrations

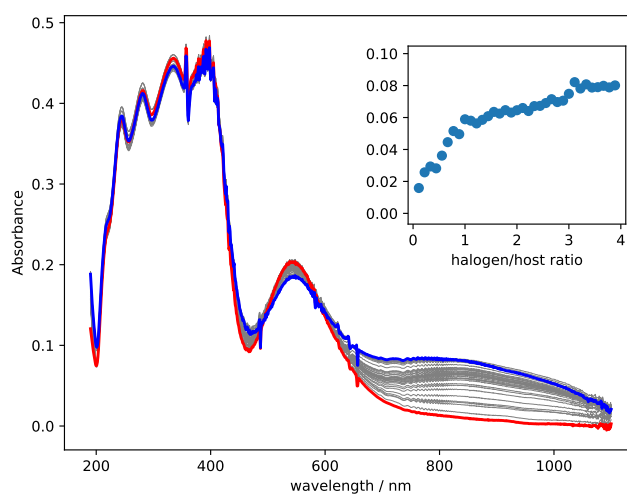

**Figure S11:** UV-vis spectra for the titration of a 0.002 M water solution of  $[\text{Cu}_4(\text{H}_{-1}\text{L})_2](\text{ClO}_4)_4$  with chloride and absorbance vs. chloride concentration at 812 nm (inset).
